# Supplementary material for: Estimated impact from the withdrawal of primary care financial incentives on selected indicators of quality of care in Scotland: controlled interrupted time series analysis
Source: PubMed Central journal article supplement (PMC10031759; doi:10.1136/bmj-2022-072098), 2023-03-22
Supplement: mord072098.ww.pdf [file mord072098.ww.pdf]

**Figure S1. Scotland single group analysis for the sixteen QOF indicators.**

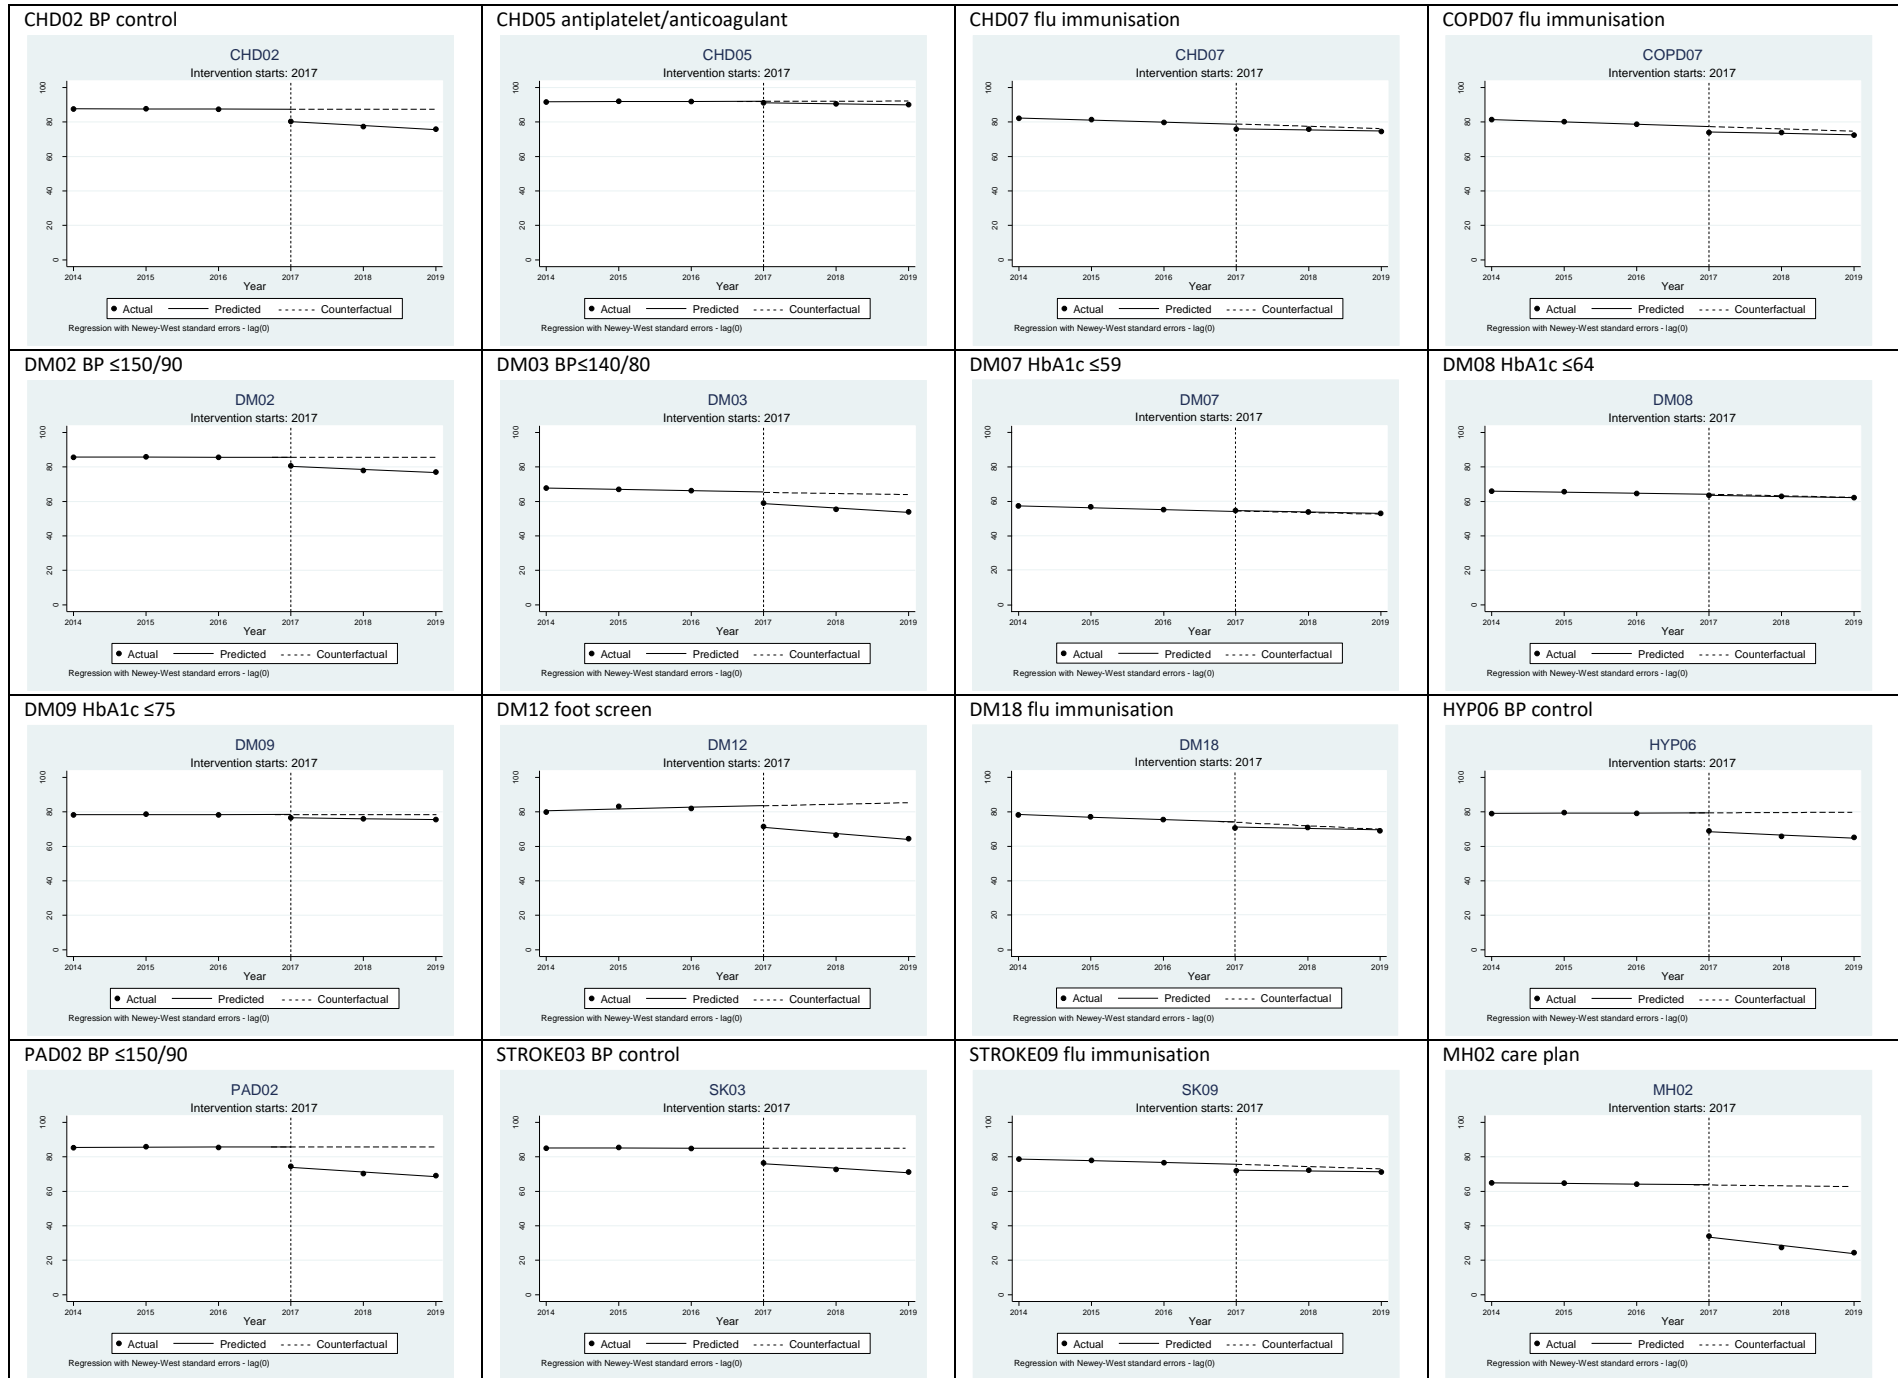

\*See table 1 in the main text for definitions of indicators.

**Figure S2. England single group analysis for the sixteen QOF indicators.**

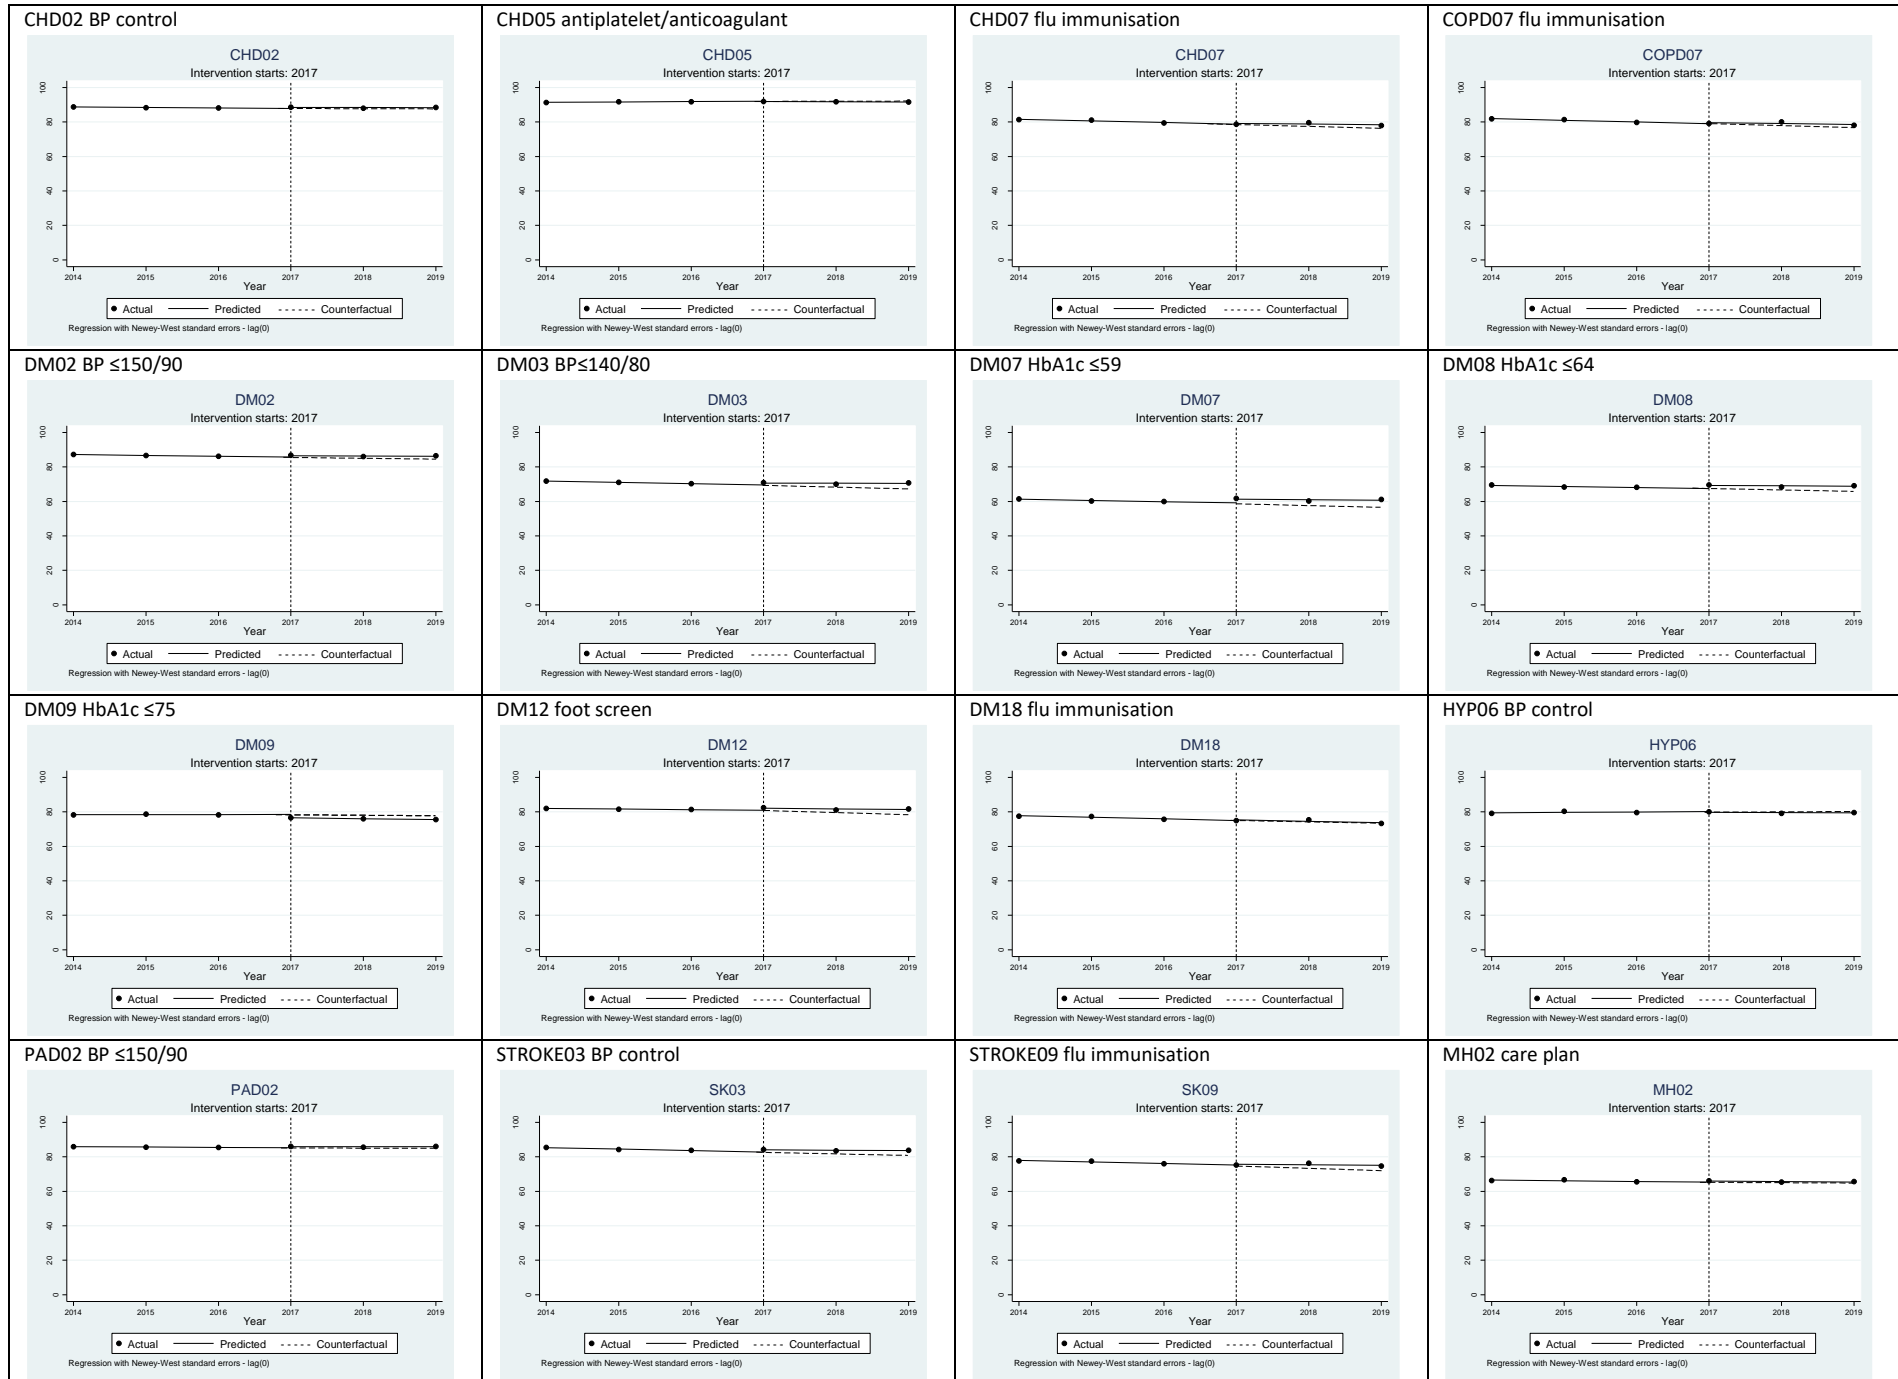

\*See table 1 in the main text for definitions of indicators.
